# Supplementary material for: Chlorin e6-Mediated Photodynamic Therapy Suppresses P. acnes-Induced Inflammatory Response via NFκB and MAPKs Signaling Pathway
Source: PubMed Central journal article supplement (PMC5261614; doi:10.1371/journal.pone.0170599), 2017-01-24
Supplement: pone.0170599.s001.pdf [file pone.0170599.s001.pdf]

| <b>Protein target</b>     | <b>Manufacturer</b>       | <b>Cat. No.</b> | <b>Species raised in;<br/>monoclonal or<br/>polyclonal</b> | <b>Dilution used</b> |
|---------------------------|---------------------------|-----------------|------------------------------------------------------------|----------------------|
| iNOS                      | Abcam                     | Ab3523          | Rabbit, polyclonal                                         | 1:1000               |
| IKK $\alpha$ / $\beta$    | Cell Signaling Technology | 2370            | Rabbit, monoclonal                                         | 1:1000               |
| p- IKK $\alpha$ / $\beta$ | Cell Signaling Technology | 2697            | Rabbit, monoclonal                                         | 1:1000               |
| I $\kappa$ B $\alpha$     | Cell Signaling Technology | 4814            | Mouse, monoclonal                                          | 1:1000               |
| p-I $\kappa$ B $\alpha$   | Cell Signaling Technology | 9246            | Mouse, monoclonal                                          | 1:1000               |
| NF $\kappa$ B p65         | Cell Signaling Technology | 6956            | Mouse, monoclonal                                          | 1:1000               |
| p-NF $\kappa$ B p65       | Cell Signaling Technology | 3033            | Rabbit, monoclonal                                         | 1:1000               |
| P38                       | Cell Signaling Technology | 9212            | Rabbit, polyclonal                                         | 1:1000               |
| p-P38                     | Cell Signaling Technology | 9211            | Rabbit, polyclonal                                         | 1:1000               |
| ERK                       | Cell Signaling Technology | 4695            | Rabbit, polyclonal                                         | 1:1000               |
| p-ERK                     | Cell Signaling Technology | 9101            | Rabbit, polyclonal                                         | 1:1000               |
| JNK                       | Cell Signaling Technology | 9252            | Rabbit, polyclonal                                         | 1:1000               |
| p-JNK                     | Cell Signaling Technology | 9251            | Rabbit, polyclonal                                         | 1:1000               |
| $\beta$ -actin            | Santa Cruz Biotechnology  | sc-47778        | Mouse, monoclonal                                          | 1:5000               |
